# Supplementary material for: Low-cost and large-scale synthesis of alkaline earth metal germanate nanowires as a new class of lithium ion battery anode material
Source: Royal Society of Chemistry journal article supplement (doi:10.1039/c2ee21580b), 2012-01-01
Supplement: c2ee21580b.pdf [file c2ee21580b.pdf]

## Electronic Supplementary Information

### Low-cost and large-scale synthesis of alkaline earth metal germanate nanowires as a new class of lithium ion battery anode materials

Wei Li,<sup>a,b</sup> Ya-Xia Yin,<sup>a</sup> Sen Xin,<sup>a,b</sup> Wei-Guo Song<sup>\*a</sup> and Yu-Guo Guo<sup>\*a</sup>

<sup>a</sup> Beijing National Laboratory for Molecular Sciences (BNLMS), Institute of Chemistry, Chinese Academy of Sciences, Beijing, 100190, P. R. China. Fax: +86 10-62557908; Tel: +86 10-62557908; E-mail: [wsong@iccas.ac.cn](mailto:wsong@iccas.ac.cn); [ygguo@iccas.ac.cn](mailto:ygguo@iccas.ac.cn).

<sup>b</sup> Graduate University of Chinese Academy of Sciences, Beijing, 100049, P. R. China.

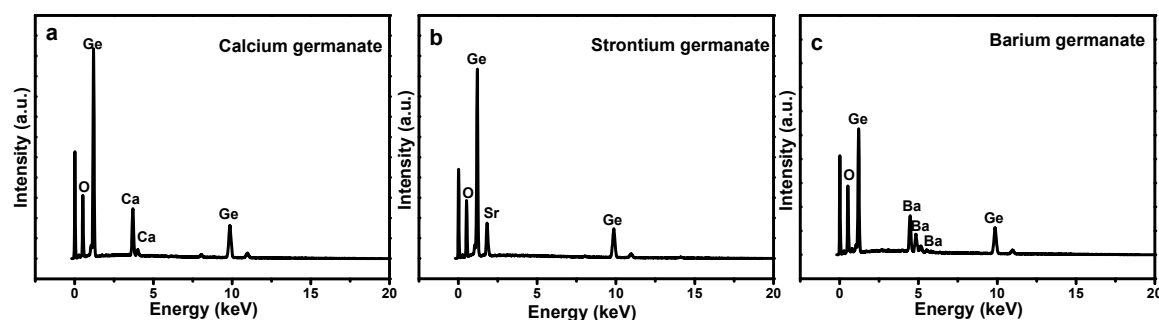

**Fig. S1** EDX spectra of (a) calcium germanate nanowires, (b) strontium germanate nanowires and (c) barium germanate nanowires.

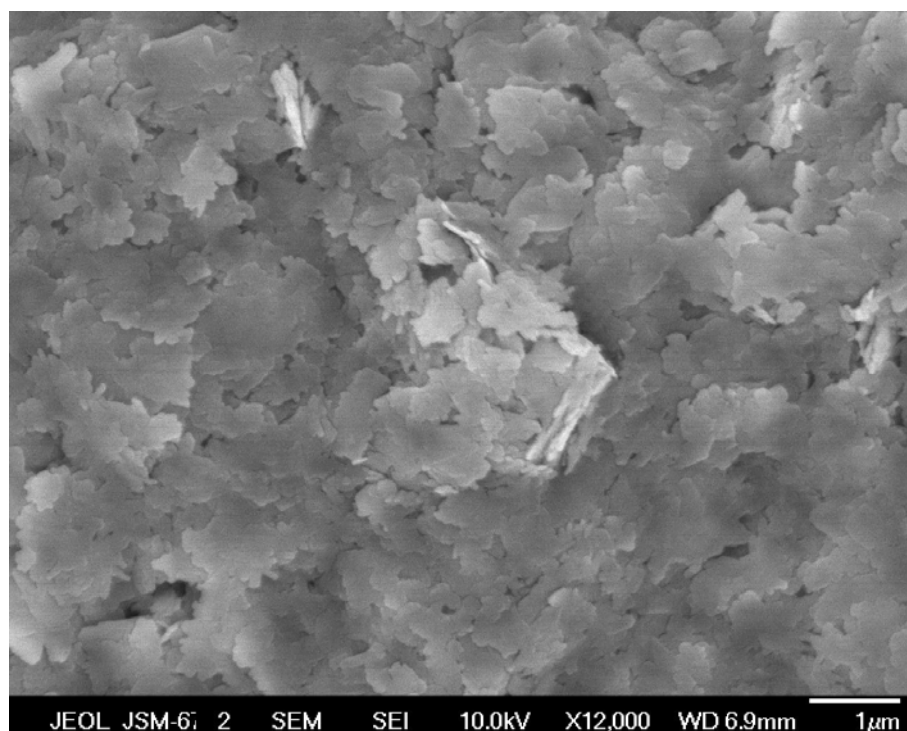

**Fig. S2** SEM image of magnesium germanate microsheets synthesized by the similar hydrothermal method.

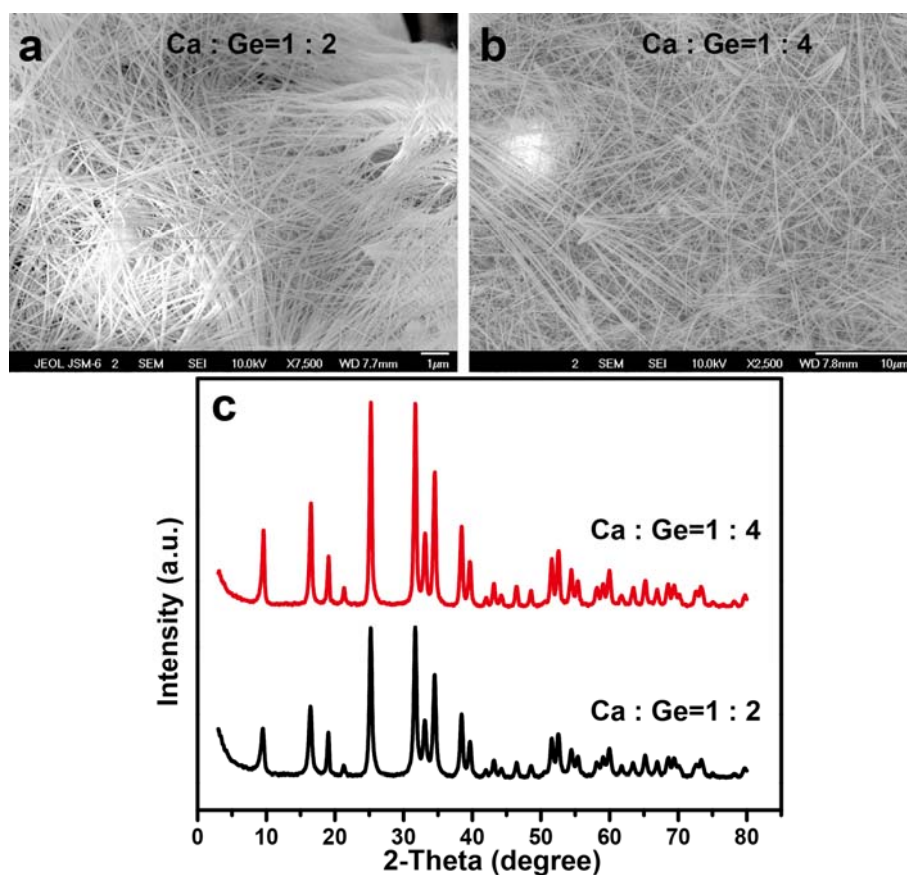

**Fig. S3** (a) SEM image of calcium germanate nanowires using the raw materials with a molar ratio of Ca : Ge = 1 : 2, (b) SEM image of calcium germanate nanowires using the raw materials with a molar ratio of Ca : Ge = 1 : 4, and (c) XRD patterns of (a) and (b)

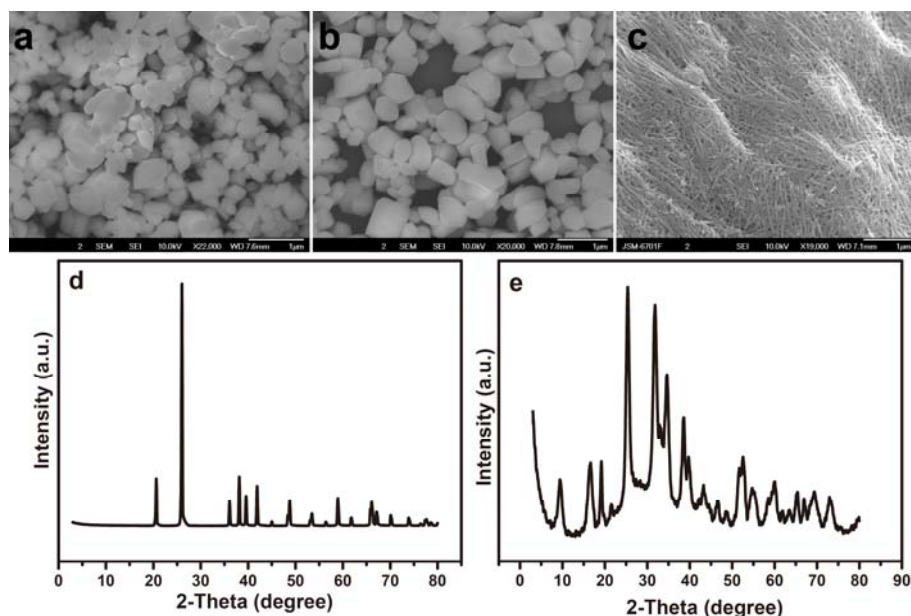

**Fig. S4** SEM images of products using different kinds of calcium salts as precursors, (a) using  $\text{CaCl}_2$ , (b) using  $\text{Ca}(\text{NO}_3)_2$ , (c) using  $\text{Ca}(\text{OH})_2$ , (d) XRD pattern of hydrothermal products using  $\text{CaCl}_2$  and  $\text{GeO}_2$ , and (e) XRD pattern of hydrothermal products using  $\text{Ca}(\text{OH})_2$  and  $\text{GeO}_2$

In order to investigate the possible growth mechanism of strontium germanate nanowires, the hydrothermal synthesis was also carried out under varying conditions. The reaction time ranged from 5 min to 24 h. Other kinds of strontium precursor salts such as  $\text{SrCl}_2$ ,  $\text{Sr}(\text{NO}_3)_2$  and  $\text{Sr}(\text{OH})_2$  were used instead of  $\text{Sr}(\text{CH}_3\text{COO})_2 \cdot 1/2\text{H}_2\text{O}$ .

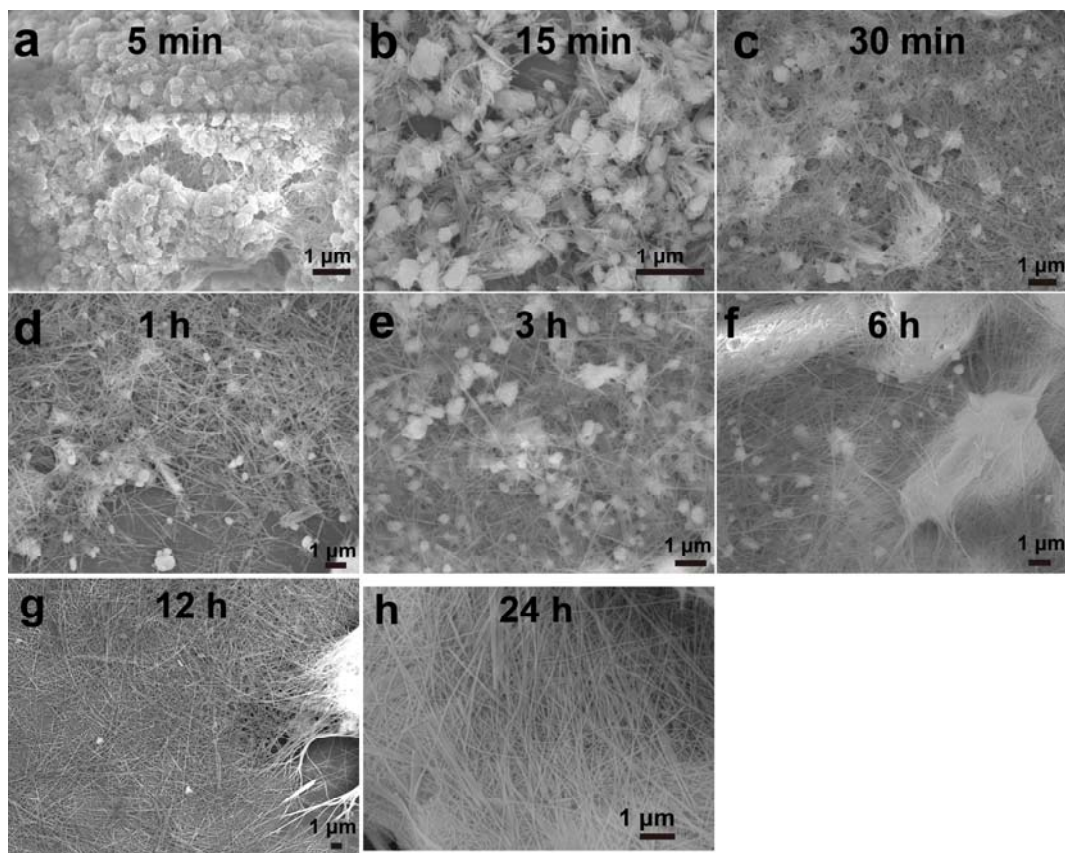

**Fig. S5** (a)-(h) SEM images of strontium germanate products synthesized for different time

ranging from 5 min to 24 h.

Fig. S5 shows the evolution of strontium germanate nanowires with increasing hydrothermal time. At the beginning, strontium acetate dissolved readily in the water while most of  $\text{GeO}_2$  powders was not dissolved. At 180 °C, strontium acetate underwent slow hydrolysis to produce  $\text{OH}^-$ .  $\text{GeO}_2$  reacts with  $\text{OH}^-$  ions to form the soluble anion of  $\text{HGeO}_3^-$ . When the concentrations of the  $\text{Sr}^{2+}$  and  $\text{HGeO}_3^-$  reach the supersaturation limit, small  $\text{SrGe}_4\text{O}_9$  nuclei is generated and undergoes Ostwald ripening process to grow into nanowires. During the hydrothermal process, the pH value of the mixture solution decreased from 8.09 to 4.32.

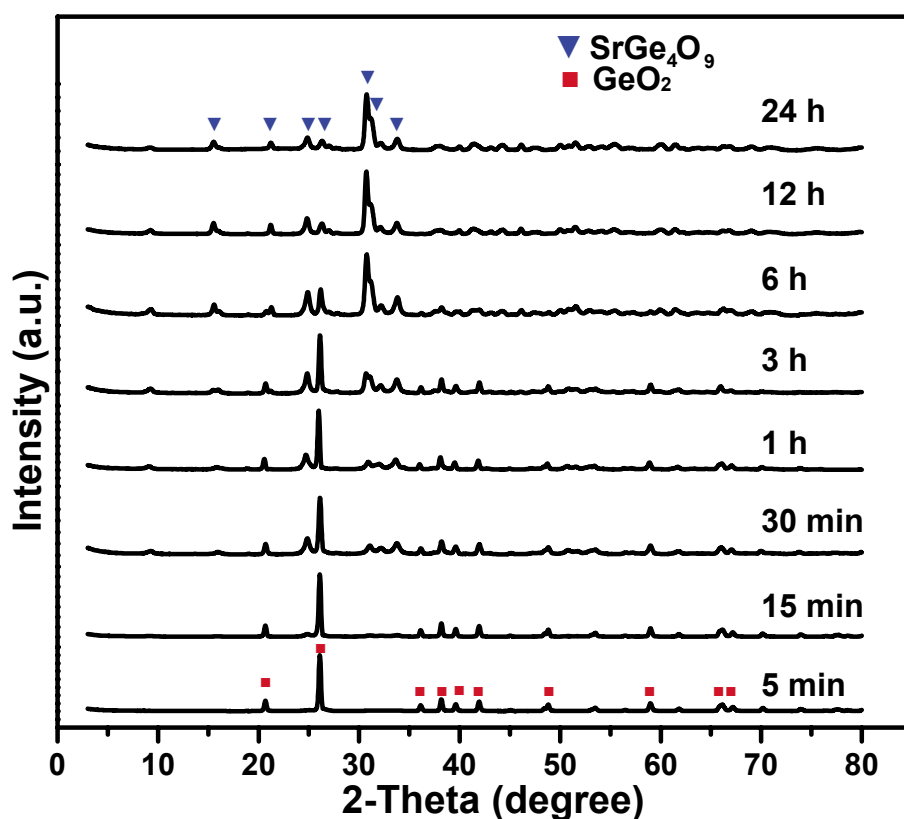

**Fig. S6** Time-dependent XRD patterns of strontium germanate products

Time-dependent XRD pattern (Fig. S6) analyses confirm the evolution of the composition of products from  $\text{GeO}_2$  to final  $\text{SrGe}_4\text{O}_9$ . A longer reaction time improves the crystalline degree of the hexagonal phase of  $\text{SrGe}_4\text{O}_9$ .

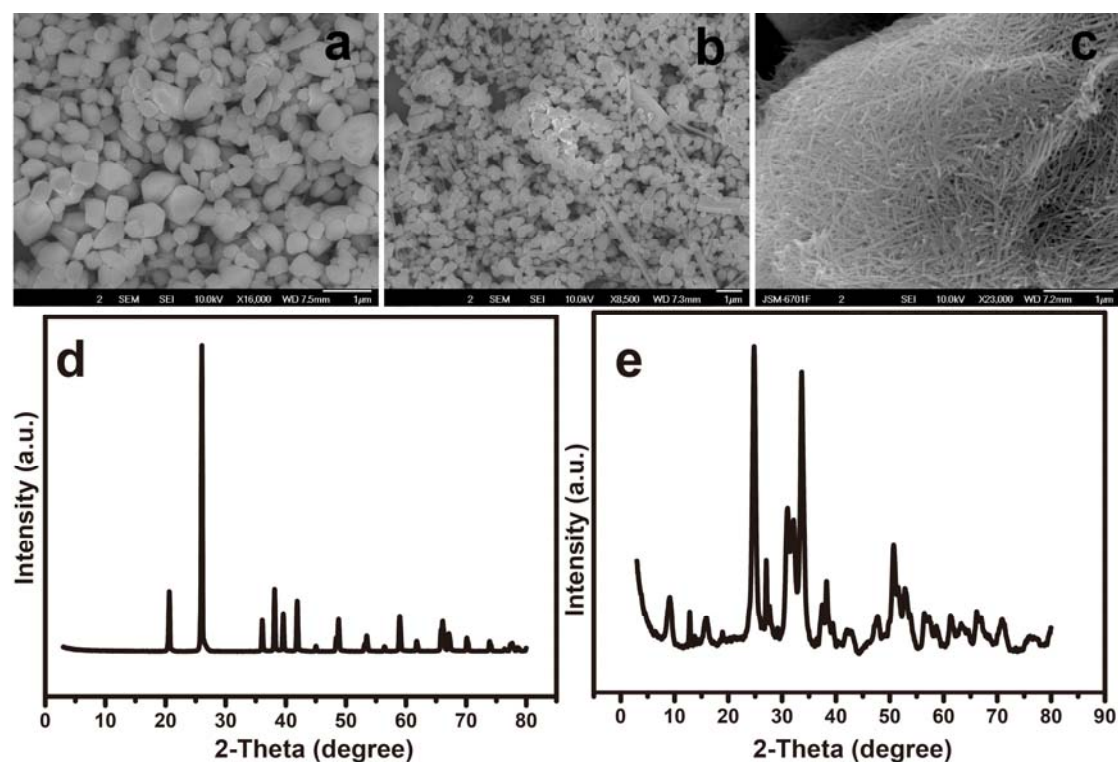

**Fig. S7** SEM images of products using different kinds of strontium salts as precursors, (a) using  $\text{Sr}(\text{NO}_3)_2$ , (b) using  $\text{SrCl}_2$ , (c) using  $\text{Sr}(\text{OH})_2$ , (d) XRD pattern of hydrothermal products using  $\text{Sr}(\text{NO}_3)_2$  and  $\text{GeO}_2$ , and (e) XRD pattern of hydrothermal products using  $\text{Sr}(\text{OH})_2$  and  $\text{GeO}_2$ .

The kind of strontium salts also influenced the morphology and composition of products. Fig. S7 showed the SEM images and XRD patterns of products using other kinds of strontium salts instead of strontium acetate as precursors. When  $\text{SrCl}_2$  or  $\text{Sr}(\text{NO}_3)_2$  is used, large  $\text{GeO}_2$  particles remained, indicating no reaction. While  $\text{Sr}(\text{OH})_2$  was used, similar  $\text{SrGe}_4\text{O}_9$  nanowires are also obtained. Both  $\text{SrCl}_2$  and  $\text{Sr}(\text{NO}_3)_2$  were difficult to hydrolyze to produce enough  $\text{OH}^-$  ions, and  $\text{GeO}_2$  cannot be transformed into  $\text{HGeO}_3^-$ .  $\text{Sr}(\text{OH})_2$  is able to provide enough  $\text{OH}^-$  and thus generates the same  $\text{SrGe}_4\text{O}_9$  nanowires. During this hydrothermal process, the pH value of the mixture solution decreased from 12.88 to 6.72.

Based on above results, the formation mechanism of  $\text{SrGe}_4\text{O}_9$  nanowires can be delineated as following:

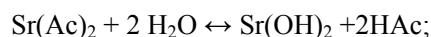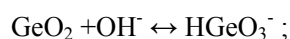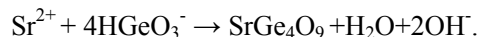

The whole reaction can be summarized in the following equation:

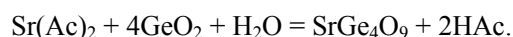

In order to investigate the possible growth mechanism of barium germanate nanowires, the hydrothermal synthesis was also carried out under varying conditions. The reaction time ranged from 5 min to 24 h. The Ba/Ge feeding ratio was changed. Other kinds of barium precursor salts such as  $\text{BaCl}_2$ ,  $\text{Ba}(\text{NO}_3)_2$  and  $\text{Ba}(\text{OH})_2$  were used instead of  $\text{Ba}(\text{CH}_3\text{COO})_2$ .

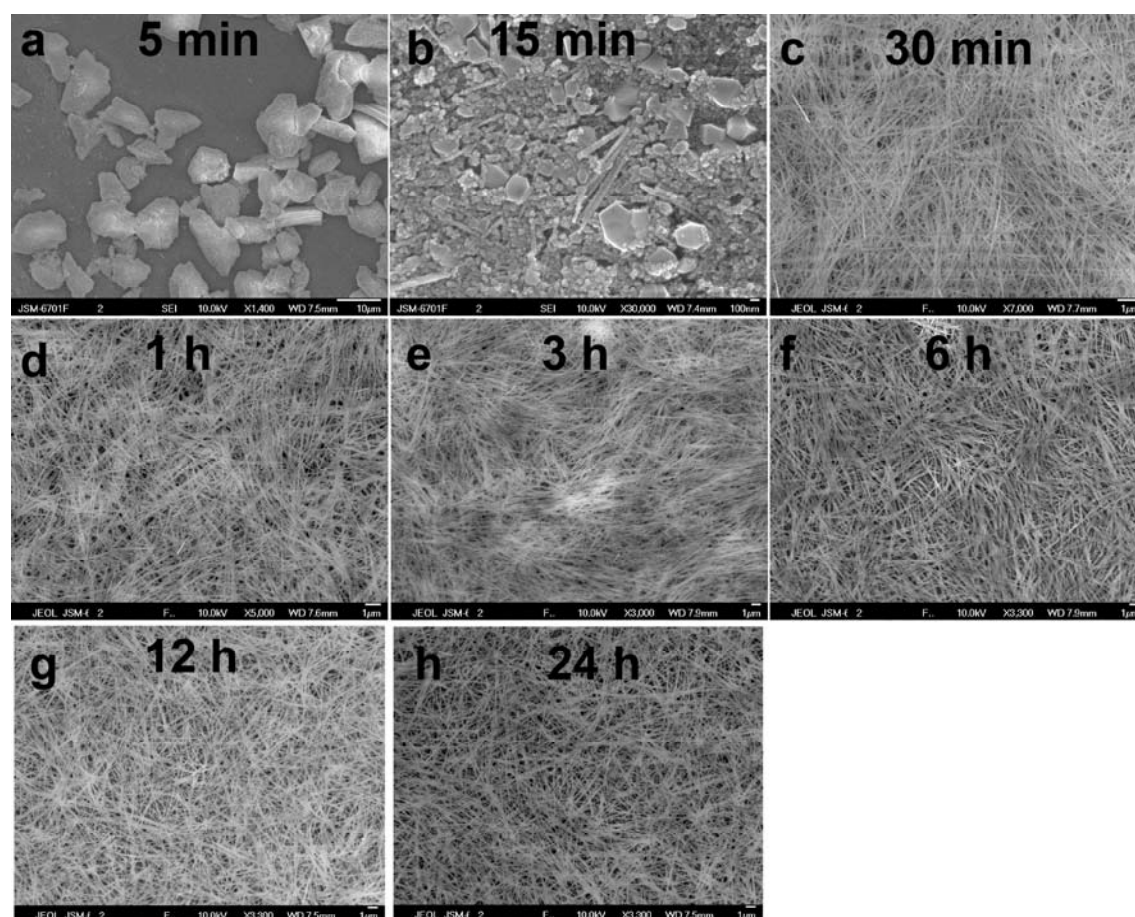

**Fig. S8** (a)-(h) SEM images of barium germanate products synthesized for different time ranging from 5 min to 24 h

Fig. S8 shows the evolution of barium germanate nanowires with increasing hydrothermal time. At the beginning, barium acetate dissolved readily in the water while most of  $\text{GeO}_2$  powders was not dissolved. At 180 °C, barium acetate underwent slow hydrolysis to produce  $\text{OH}^-$ .  $\text{GeO}_2$  reacts with  $\text{OH}^-$  ions to form the soluble anion of  $\text{HGeO}_3^-$ . When the concentrations of the  $\text{Ba}^{2+}$  and  $\text{HGeO}_3^-$  reach the supersaturation limit, small  $\text{BaGe}_4\text{O}_9$  nuclei is generated and undergoes Ostwald ripening process to grow into nanowires. During the hydrothermal process, the pH value of the mixture solution decreased from 8.40 to 5.80.

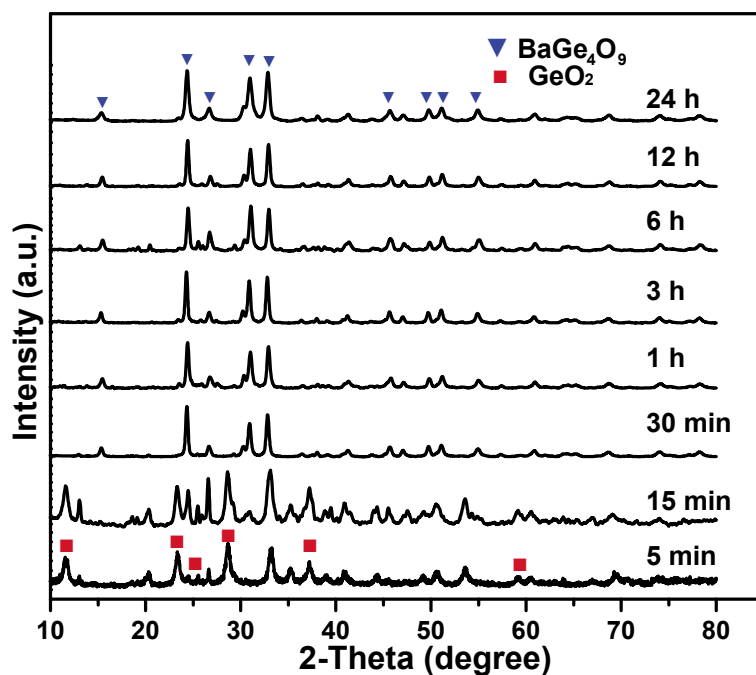

**Fig. S9** Time-dependent XRD patterns of barium germanate products

Time-dependent XRD pattern (Fig. S9) analyses confirm the evolution of the composition of products from  $\text{GeO}_2$  to final  $\text{BaGe}_4\text{O}_9$ . A longer reaction time improves the crystalline degree of the hexagonal phase of  $\text{BaGe}_4\text{O}_9$ .

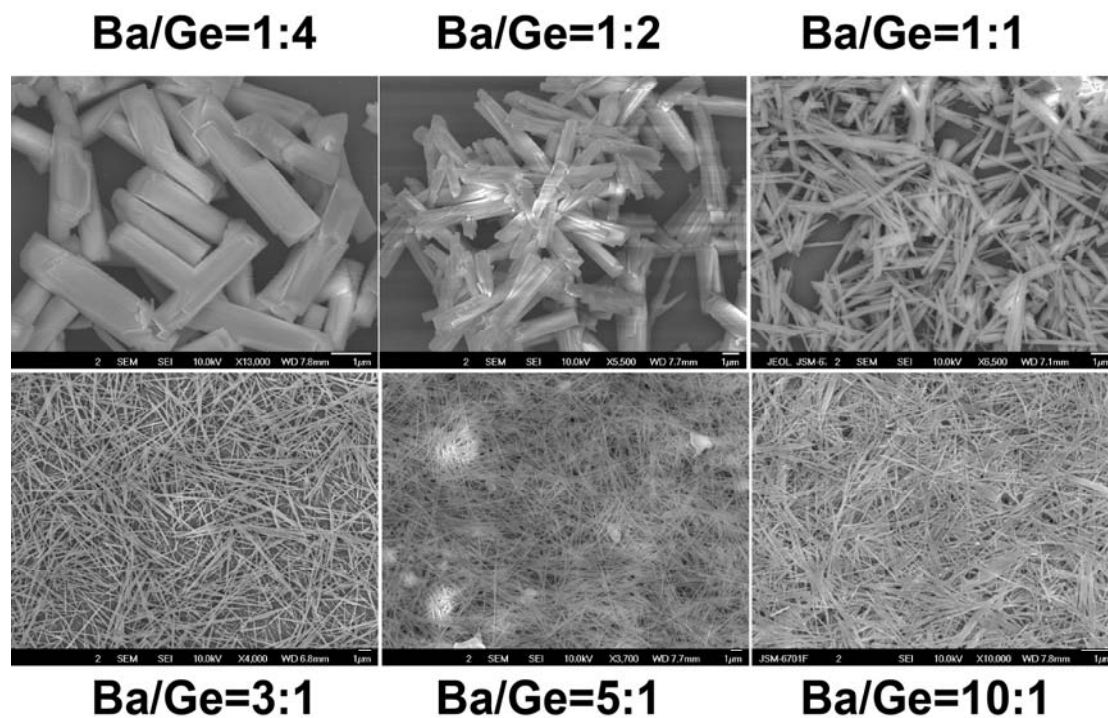

**Fig. S10** SEM images of products using raw materials with different molar ratio of Ba : Ge ranging from 1/4 to 10/1.

As shown in Fig. S10, the Ba/Ge molar ratio plays a critical role in the morphology of as-obtained products. With the increasing Ba/Ge atomic ratio, the length-to-diameter ratio of barium germanate rises. The morphology evolves from micro-size rod to long nanowires.

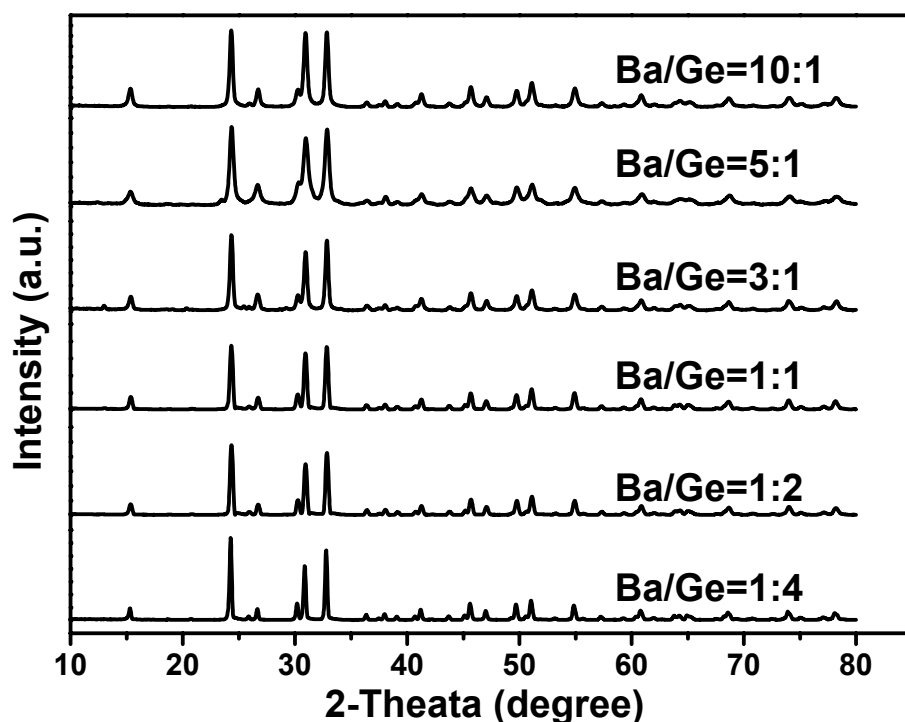

**Fig. S11** XRD patterns of products using raw materials with different molar ratio of Ba : Ge. All the as-obtained products from different initial Ba/Ge molar ratios are the hexagonal phase of  $\text{BaGe}_4\text{O}_9$ . The barium component in excess still remains in the solution in the form of soluble  $\text{Ba}^{2+}$  ions after the hydrothermal reaction.

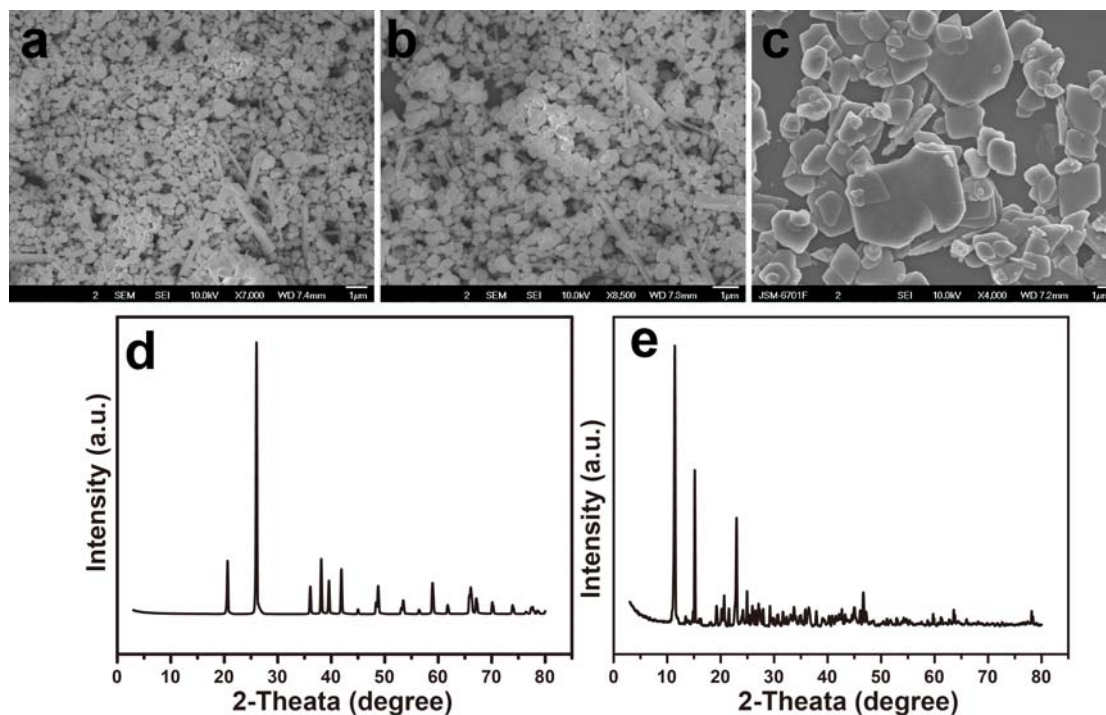

**Fig. S12** SEM images of products using different kinds of barium salts as precursors, (a) using  $\text{BaCl}_2$ , (b) using  $\text{Ba}(\text{NO}_3)_2$ , (c) using  $\text{Ba}(\text{OH})_2$ , (d) XRD pattern of hydrothermal products using  $\text{BaCl}_2$  and  $\text{GeO}_2$ , and (e) XRD pattern of hydrothermal products using  $\text{Ba}(\text{OH})_2$  and  $\text{GeO}_2$ .  $\text{BaGe}_4\text{O}_9$  nanowires cannot be produced when  $\text{Ba}(\text{OH})_2$  is used instead of barium acetate, as

illustrated in Fig. S12. Because it has much higher solubility and basicity than  $\text{Ca}(\text{OH})_2$  as well as  $\text{Sr}(\text{OH})_2$ ,  $\text{Ba}(\text{OH})_2$  can provide large amounts of  $\text{OH}^-$  in the system. As a result,  $\text{GeO}_2$  may be dissolved quickly to generate large numbers of  $\text{HGeO}_3^-$ . High concentrations of  $\text{Ba}^{2+}$  and  $\text{HGeO}_3^-$  promote the reaction rate to produce large barium germanate crystals instantly.

Based on above results, the growth mechanism of  $\text{BaGe}_4\text{O}_9$  nanowires can be described as follows:

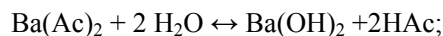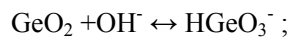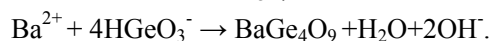

The whole reaction can be summarized in the following equation:

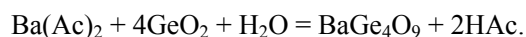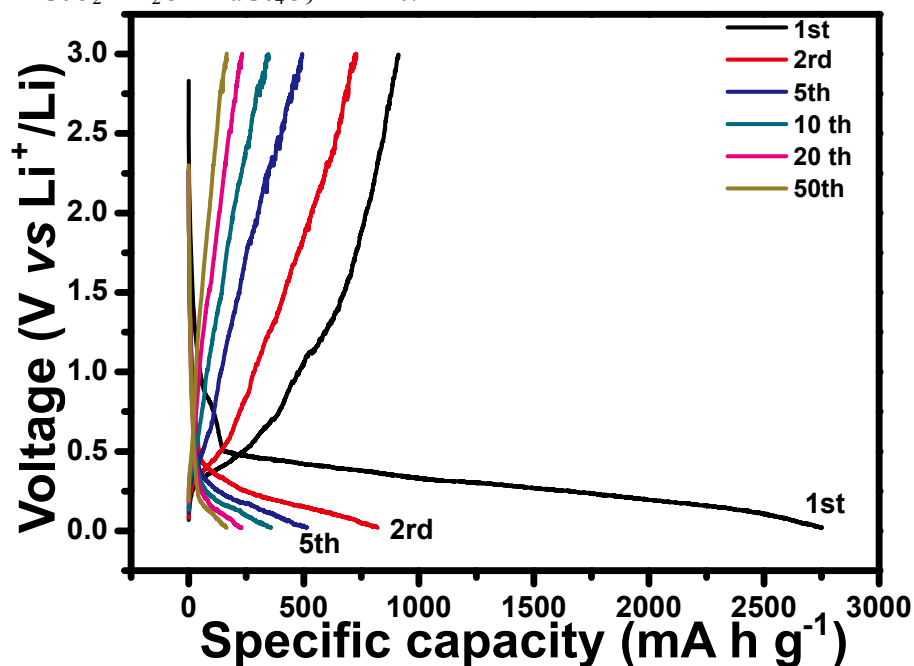

**Fig. S13** The discharge/charge voltage profiles of commercial  $\text{GeO}_2$  under a current density of  $100 \text{ mA g}^{-1}$ .

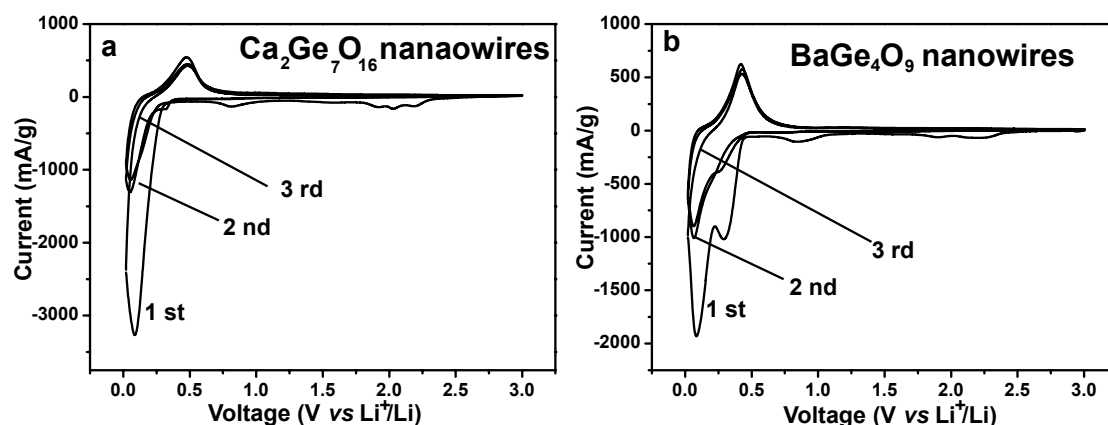

**Fig. S14** The initial three cyclic voltammogram (CV) profiles of  $\text{Ca}_2\text{Ge}_7\text{O}_{16}$  and  $\text{BaGe}_4\text{O}_9$  nanowires between 0.02 and 3 V under a current density of  $100 \text{ mA g}^{-1}$ .

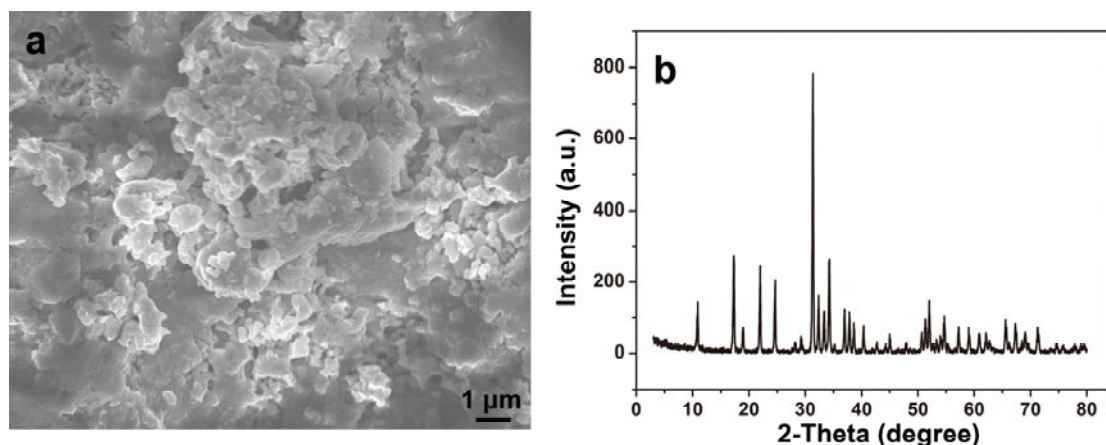

**Fig. S15** (a) SEM image of  $\text{Ca}_2\text{Ge}_7\text{O}_{16}$  bulks prepared by a solid state reaction, (b) XRD pattern of  $\text{Ca}_2\text{Ge}_7\text{O}_{16}$  bulks.

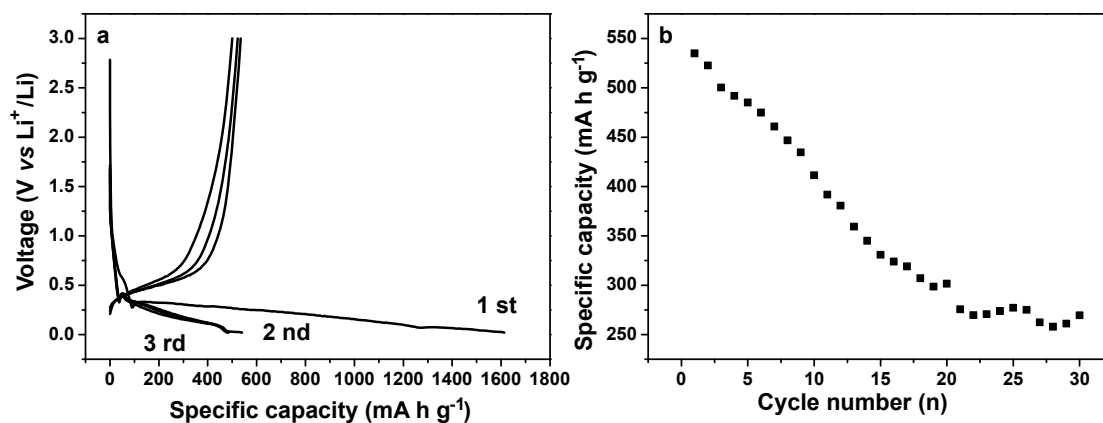

**Fig. S16** (a) The initial three discharge/charge voltage profiles of  $\text{Ca}_2\text{Ge}_7\text{O}_{16}$  bulks prepared by a solid state reaction under a current density of  $100 \text{ mA g}^{-1}$ , (b) Cycle performance of  $\text{Ca}_2\text{Ge}_7\text{O}_{16}$  bulks under a current density of  $100 \text{ mA g}^{-1}$  in the voltage range of 0.02–3.0 V.

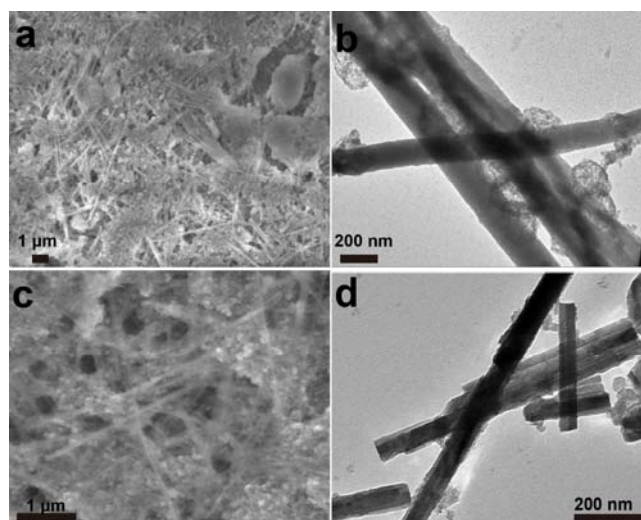

**Fig. S17** (a) SEM and (b) TEM images of calcium germanate ( $\text{Ca}_2\text{Ge}_7\text{O}_{16}$ ) electrode materials after 100 cycles; (c) SEM (d) TEM images of barium germanate ( $\text{BaGe}_4\text{O}_9$ ) electrode materials after 100 cycles.
